# Supplementary material for: Neighbor predation linked to natural competence fosters the transfer of large genomic regions in Vibrio cholerae
Source: eLife journal article supplement (doi:10.7554/elife.48212), 2019-09-03
Supplement: supp [file elife-48212-supp-v1.zip]

Archive with 20 entries (20 files):
- elife_poa_e48212_Figure_4_figure_supplement_3.pdf
- elife_poa_e48212_Transparent_Reporting_File.pdf
- elife_poa_e48212_Figure_1_figure_supplement_1.pdf
- elife_poa_e48212_Supplementary_file_1.xlsx
- elife_poa_e48212_Figure_4_figure_supplement_2.pdf
- elife_poa_e48212_Figure_4_figure_supplement_7.pdf
- elife_poa_e48212_Figure_2_figure_supplement_2.pdf
- elife_poa_e48212_Figure_2_figure_supplement_1.pdf
- elife_poa_e48212_Figure_4_figure_supplement_1_source_data_1.xlsx
- elife_poa_e48212_Figure_1_source_data_1.xlsx
- elife_poa_e48212_Figure_4_figure_supplement_6.pdf
- elife_poa_e48212_Figure_4_figure_supplement_8.pdf
- elife_poa_e48212_Supplementary_file_2.xlsx
- elife_poa_e48212_Figure_3_source_data_1.xlsx
- elife_poa_e48212_Figure_4_figure_supplement_1.pdf
- elife_poa_e48212_Figure_4_source_data_1.xlsx
- elife_poa_e48212_Figure_4_figure_supplement_4.pdf
- elife_poa_e48212_Supplementary_file_3.xlsx
- elife_poa_e48212_Figure_4_figure_supplement_9.pdf
- elife_poa_e48212_Figure_4_figure_supplement_5.pdf
