# Supplementary material for: Neighbor predation linked to natural competence fosters the transfer of large genomic regions in Vibrio cholerae
Source: eLife journal article supplement (doi:10.7554/elife.48212), 2019-09-03
Supplement: supp [file elife-48212-supp-v1.zip › elife_poa_e48212_Figure_1_source_data_1.xlsx]

## Sheet: Fig1A
	WT [KanR]	WT [KanR]	WT [KanR]	WT [CmR]	WT [CmR]	WT [CmR]	T6SS- [KanR]	T6SS- [KanR]	T6SS- [KanR]	T6SS- [CmR]	T6SS- [CmR]	T6SS- [CmR]
50 kbp	0.000625	0.000206	0.000612	0.00095	0.000265	0.00135	1.42e-05	1.09e-05	6.57e-06	8.33e-06	7.27e-06	4.57e-06
100 kbp	0.000326	0.000125	0.000319	0.000187	0.000175	0.00033	6.9e-06	1e-06	2.29e-06	7.59e-06	1.5e-06	5.71e-07
200 kbp	0.000194	0.000182	0.000489	0.000216	0.000215	0.000483	1.67e-06	8.89e-06	6.47e-06	6.66667e-07	7.78e-06	6.47e-06
575 kbp	0.000308	0.000103	0.000465	0.000385	0.000134	0.000374	2.7e-06	5e-06	3.2e-06	2.16e-06	3e-06	2e-06
chr I / chr II	3.62e-05	2.17e-05	3.42e-05	4.26e-05	2.86e-05	5.77e-05	2.73e-06	1.05e-06	2.19e-06	3.94e-06	2.63e-06	6.25e-07

## Sheet: Fig1B
	WT	WT	WT	T6SS-	T6SS-	T6SS-
50 kbp	1.82e-05	4.21e-06	7.11e-06	2.13e-07	3.46e-07	4.57e-07
100 kbp	4.15e-06	1.05e-06	2.7e-06	2.6e-08	6.25e-08	2.6e-08
200 kbp	5.32e-07	5.95e-07	1.7e-06	0	0	0
575 kbp	3.01e-07	7.59e-07	4.57e-07	0	0	0
chr I / chr II	9.48e-09	1.52e-08	2.6e-08	0	0	0

## Sheet: Fig1C
	WT	WT	WT	T6SS-	T6SS-	T6SS-
50 kbp	5.29e-06	6.96e-06	7.2e-06	3.3e-06	3.1e-06	7.7e-06
100 kbp	3.11e-07	7.24e-07	5.8e-07	3.93e-07	3.3e-07	1.1e-06
200 kbp	5.41e-08	2.2e-07	1.8e-07	6.17e-07	2.2e-07	3e-07
575 kbp	5.59e-08	3.1e-07	1.9e-07	7.15e-07	1.6e-07	8.5e-07
chr I / chr II	4.1e-07	3.9e-07	2.1e-07	5.99e-07	2.8e-07	4.5e-07
