# Supplementary material for: Neighbor predation linked to natural competence fosters the transfer of large genomic regions in Vibrio cholerae
Source: eLife journal article supplement (doi:10.7554/elife.48212), 2019-09-03
Supplement: supp [file elife-48212-supp-v1.zip › elife_poa_e48212_Figure_3_source_data_1.xlsx]

## Sheet: Fig3B
replicate 1	75.237	95.793	76.495	128.358	38.444	90.921	73.373	104.945	63.663	96.317	21.713	66.216	74.212	57.244	89.086	35.664	103.779	142.765	34.033	81.256
replicate 2	12.31	116.174	73.683	60.467	38.366	26.308	99.871	86.432	21.969	123.896	42.775	74.347	73.379	39.686	28.53	12.007	49.106	17.085	47.988	44.954
replicate 3	168.241	23.601	100.342	48.134	96.47	56.842	140.43	34.004	69.022	161.75	66.076	81.773	73.178	24.079	60.11	30.23	25.362	148.27	62.524	73.591

## Sheet: Fig3C
1	48.3333
2	16.6667
3	15
4	6.66667
5	5
6	3.33333
7	1.66667
8	3.33333
9	0
10	0
11	0
12	0
13	0

## Sheet: Fig3D
1 - 10	42
10 - 20	31
20 - 30	10
30 - 40	19
40 - 50	15
50 - 60	6
60 - 70	4
70 - 80	7
80 - 90	2
90 - 100	0
100 - 110	3
110 -120	2
120 - 130	0
130 - 140	0
140 - 150	0
>150	1
