# Supplementary material for: Neighbor predation linked to natural competence fosters the transfer of large genomic regions in Vibrio cholerae
Source: eLife journal article supplement (doi:10.7554/elife.48212), 2019-09-03
Supplement: supp [file elife-48212-supp-v1.zip › elife_poa_e48212_Figure_4_figure_supplement_1_source_data_1.xlsx]

## Sheet: Fig4-supp1A
	killingreplicate 1	killing replicate 2	killing replicate 3	gDNA replicate 1	gDNA replicate 2	gDNA replicate 3
vipA-aph	9.6e-05	0.000174	0.000267	0.000166	0.000103
lacZ-aph	3.46e-05	2.91e-05		0.000112	0.000165

## Sheet: Fig4-supp1B
	predator T6SS + / VCA0747-aph	predator T6SS + / VCA0747-aph T6SS-	predator T6SS - / VCA0747-aph T6SS-
replicate 1	9.45e-05	0.000626	1.22e-06
replicate 2	0.000239	0.00078	2.71e-06
replicate 3	0.000459

## Sheet: Fig4-supp1C
	T6SS+ prey replicate 1	T6SS+ prey replicate 2	T6SS+ prey replicate 3	T6SS- prey replicate 1	T6SS- prey replicate 2	T6SS- prey replicate 3
VCA0747-aph	9.45e-05	0.000239	0.000459	0.000626	0.00078
lacZ-aph	3.46e-05	2.91e-05		8.2e-05	0.000162

## Sheet: Fig4-supp1D
	WT replicate 1	WT replicate 2	WT replicate 3	T6SS- replicate 1	T6SS- replicate 2	T6SS- replicate 3
VCA0107-aph	8.13e-05	0.0001		7.59e-05	0.000265	0.000158
VCA0747-aph	6.03e-05	0.000143	0.000159	4.44e-05	0.000109	4.25e-05
VCA0747-aph T6SS-	2.59e-05	5.29e-05	0.000183	5.06e-05	6.54e-05	9.42e-05
VCA0747-aph T6SS- comEC-	6.15e-05	9.22e-05	8.33e-05	9.8e-05	8.65e-05	0.000142
lacZ-aph	7.93e-05	0.000232	9.2e-05	8.07e-05	0.000127	0.000189
lacZ-aph T6SS-	8.62e-05	0.000261	0.000172	7.83e-05	9.41e-05	0.000135
