# Supplementary material for: Neighbor predation linked to natural competence fosters the transfer of large genomic regions in Vibrio cholerae
Source: eLife journal article supplement (doi:10.7554/elife.48212), 2019-09-03
Supplement: supp [file elife-48212-supp-v1.zip › elife_poa_e48212_Figure_4_source_data_1.xlsx]

## Sheet: Fig4B
	VCA0107 (T6SS+ / T6SS-)	VCA0107 (T6SS+ / T6SS-)	VCA0107 (T6SS+ / T6SS-)	VCA0107 (T6SS+ / T6SS-)	VCA0107 (T6SS+ / T6SS-)	VCA0107 (T6SS+ / T6SS-)	VCA0107 (T6SS+ / T6SS-)	VCA0107 (T6SS+ / T6SS-)	VCA0107 (T6SS+ / T6SS-)	VCA0107 (T6SS+ / T6SS-)	VCA0107 (T6SS+ / T6SS-)	VCA0107 (T6SS+ / T6SS-)	VCA0107 (T6SS+ / T6SS-)	VCA0107 (T6SS+ / T6SS-)	VCA0107 (T6SS+ / T6SS-)	VCA0107 (T6SS+ / T6SS-)	VCA0107 (T6SS+ / T6SS-)	VCA0107 (T6SS+ / T6SS-)	VCA0107 (T6SS+ / T6SS-)	VCA0107 (T6SS+ / T6SS-)	VCA0747 (T6SS+ / T6SS+)	VCA0747 (T6SS+ / T6SS+)	VCA0747 (T6SS+ / T6SS+)	VCA0747 (T6SS+ / T6SS+)	VCA0747 (T6SS+ / T6SS+)	VCA0747 (T6SS+ / T6SS+)	VCA0747 (T6SS+ / T6SS+)	VCA0747 (T6SS+ / T6SS+)	VCA0747 (T6SS+ / T6SS+)	VCA0747 (T6SS+ / T6SS+)	VCA0747 (T6SS+ / T6SS+)	VCA0747 (T6SS+ / T6SS+)	VCA0747 (T6SS+ / T6SS+)	VCA0747 (T6SS+ / T6SS+)	VCA0747 (T6SS+ / T6SS+)	VCA0747 (T6SS+ / T6SS+)	VCA0747 (T6SS+ / T6SS+)	VCA0747 (T6SS+ / T6SS+)	VCA0747 (T6SS+ / T6SS+)	VCA0747 (T6SS+ / T6SS+)	VCA0747 (T6SS+ / T6SS-)	VCA0747 (T6SS+ / T6SS-)	VCA0747 (T6SS+ / T6SS-)	VCA0747 (T6SS+ / T6SS-)	VCA0747 (T6SS+ / T6SS-)	VCA0747 (T6SS+ / T6SS-)	VCA0747 (T6SS+ / T6SS-)	VCA0747 (T6SS+ / T6SS-)	VCA0747 (T6SS+ / T6SS-)
replicate 1	75.237	95.793	76.495	128.358	38.444	90.921	73.373	104.945	63.663	96.317	21.713	66.216	74.212	57.244	89.086	35.664	103.779	142.765	34.033	81.256	17.62	66.27	123.036	63.832	39.312	24.863	13.263	20.313	79.056	18.399	28.444	52.5	23.182	27.166	70.617	35.129	31.751	80.901	50.292	59.774	54.458	139.163	6.809	47.576	20.417	81.468	84.306	37.193	229.113
replicate 2	12.31	116.174	73.683	60.467	38.366	26.308	99.871	86.432	21.969	123.896	42.775	74.347	73.379	39.686	28.53	12.007	49.106	17.085	47.988	44.954	134.452	4.268	16.356	123.834	98.444	70.009	64.761	58.15	122.915	36.472	71.284	18.877	9.707	45.708	94.776	133.864	22.268	19.901	40.118	1.475	35.813	148.154	5.942	18.888	51.15	36.248	43.947	216.564	40.891
replicate 3	168.241	23.601	100.342	48.134	96.47	56.842	140.43	34.004	69.022	161.75	66.076	81.773	73.178	24.079	60.11	30.23	25.362	148.27	62.524	73.591	16.16	40.478	90.09	27.926	24.604	134.109	24.904	113.965	62.119	19.978	12.055	56.696	32.737	227.391	11.181	142.486	51.513	35.953	31.877	69.896
[truncated: 111 more columns]

## Sheet: Fig4C
	VCA0107 (T6SS+ / T6SS-)	VCA0107 (T6SS+ / T6SS-)	VCA0107 (T6SS+ / T6SS-)	VCA0107 (T6SS+ / T6SS-)	VCA0107 (T6SS+ / T6SS-)	VCA0107 (T6SS+ / T6SS-)	VCA0107 (T6SS+ / T6SS-)	VCA0107 (T6SS+ / T6SS-)	VCA0107 (T6SS+ / T6SS-)	VCA0107 (T6SS+ / T6SS-)	VCA0107 (T6SS+ / T6SS-)	VCA0107 (T6SS+ / T6SS-)	VCA0107 (T6SS+ / T6SS-)	VCA0107 (T6SS+ / T6SS-)	VCA0107 (T6SS+ / T6SS-)	VCA0107 (T6SS+ / T6SS-)	VCA0107 (T6SS+ / T6SS-)	VCA0107 (T6SS+ / T6SS-)	VCA0107 (T6SS+ / T6SS-)	VCA0107 (T6SS+ / T6SS-)	VCA0747 (T6SS+ / T6SS+)	VCA0747 (T6SS+ / T6SS+)	VCA0747 (T6SS+ / T6SS+)	VCA0747 (T6SS+ / T6SS+)	VCA0747 (T6SS+ / T6SS+)	VCA0747 (T6SS+ / T6SS+)	VCA0747 (T6SS+ / T6SS+)	VCA0747 (T6SS+ / T6SS+)	VCA0747 (T6SS+ / T6SS+)	VCA0747 (T6SS+ / T6SS+)	VCA0747 (T6SS+ / T6SS+)	VCA0747 (T6SS+ / T6SS+)	VCA0747 (T6SS+ / T6SS+)	VCA0747 (T6SS+ / T6SS+)	VCA0747 (T6SS+ / T6SS+)	VCA0747 (T6SS+ / T6SS+)	VCA0747 (T6SS+ / T6SS+)	VCA0747 (T6SS+ / T6SS+)	VCA0747 (T6SS+ / T6SS+)	VCA0747 (T6SS+ / T6SS+)	VCA0747 (T6SS+ / T6SS-)	VCA0747 (T6SS+ / T6SS-)	VCA0747 (T6SS+ / T6SS-)	VCA0747 (T6SS+ / T6SS-)	VCA0747 (T6SS+ / T6SS-)	VCA0747 (T6SS+ / T6SS-)	VCA0747 (T6SS+ / T6SS-)	VCA0747 (T6SS+ / T6SS-)	VCA0747 (T6SS+ / T6SS-)
replicate 1	1	3	1	3	1	2	3	3	1	5	3	2	2	2	7	1	1	5	1	1	1	2	8	4	4	2	1	3	2	1	3	1	1	2	4	4	2	6	5	2	3	8	1	3	1	2	6	2	13
replicate 2	1	1	1	1	2	1	3	4	3	3	1	2	2	1	1	1	1	1	1	1	5	1	1	5	4	6	5	1	8	1	2	1	2	2	3	5	2	2	1	1	2	7	3	1	4	2	5	9	4
replicate 3	1	1	1	6	2	1	8	2	4	5	2	4	4	1	3	1	1	6	1	8	2	3	2	6	3	12	3	5	2	5	1	2	5	6	1	3	5	2	4	2
[truncated: 111 more columns]
