# Supplementary figures and images for: Neighbor predation linked to natural competence fosters the transfer of large genomic regions in Vibrio cholerae
Source: eLife journal article supplement (doi:10.7554/elife.48212), 2019-09-03

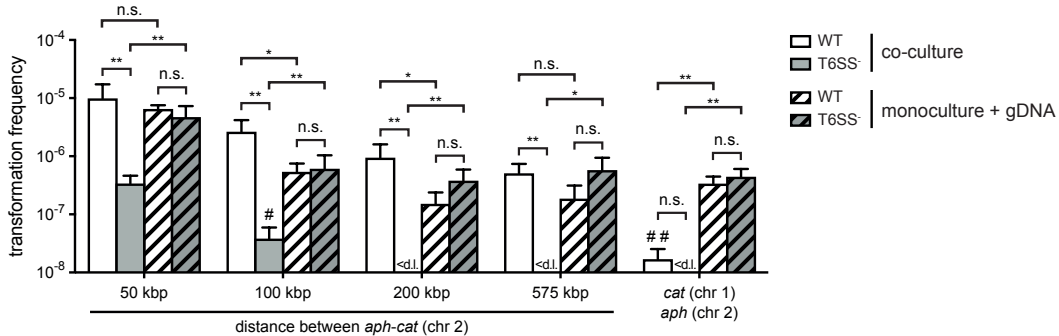

Supplement: supp [file elife-48212-supp-v1.zip]

**A**

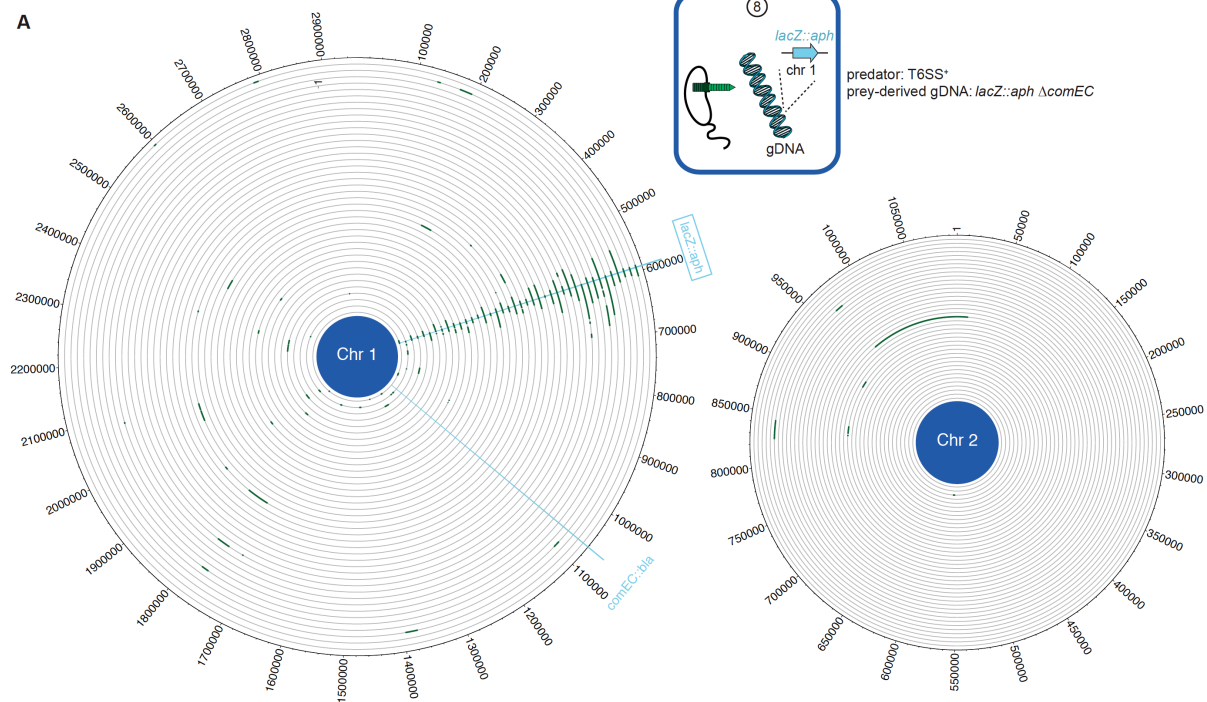

**B**

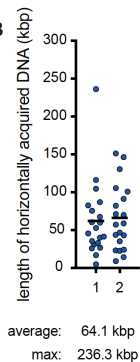

**C**

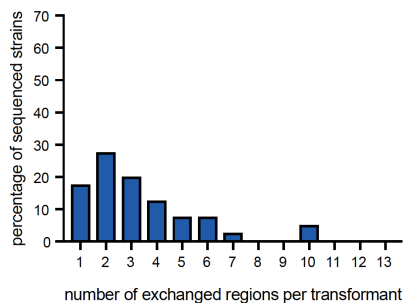

**D**

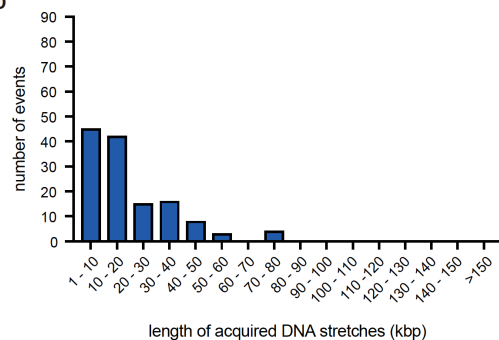

Supplement: supp [file elife-48212-supp-v1.zip]

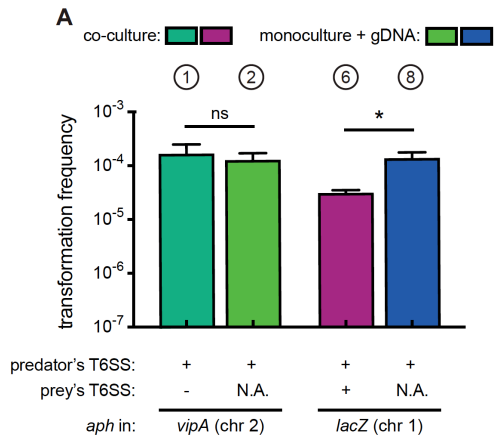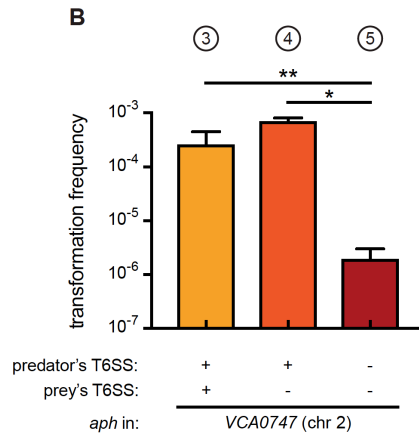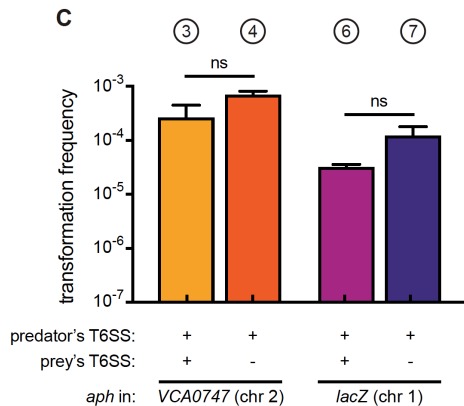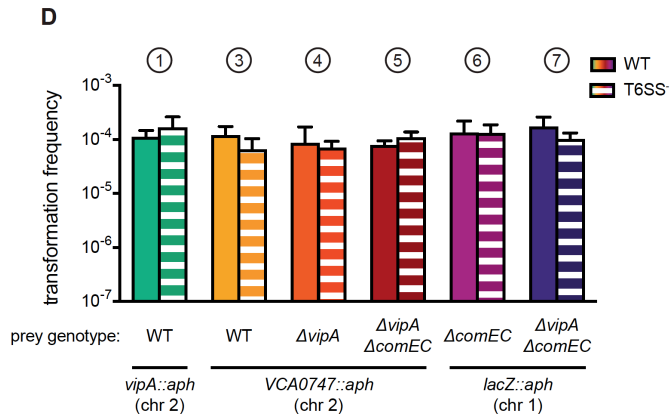

Supplement: supp [file elife-48212-supp-v1.zip]

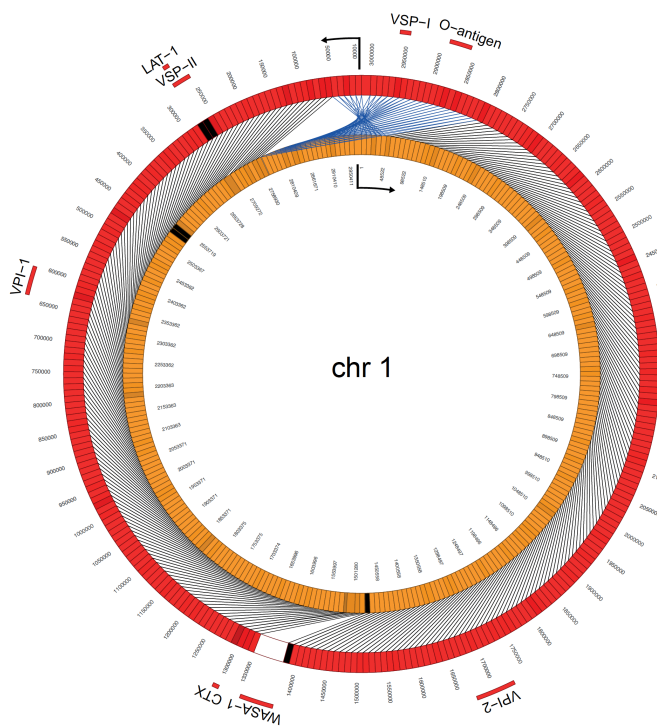

A1552  
N16961

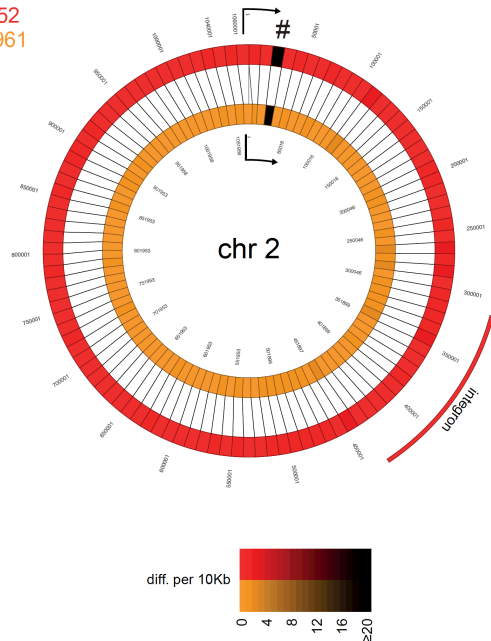

diff. per 10Kb

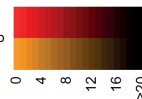

Supplement: supp [file elife-48212-supp-v1.zip]

N16961 (this study, Strep<sup>R</sup>)

N16961 (reference, Strep<sup>S</sup>)

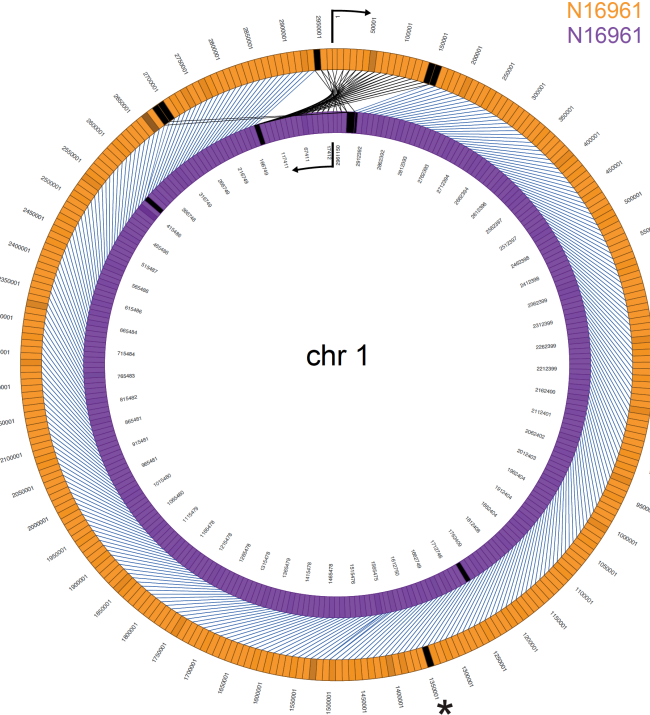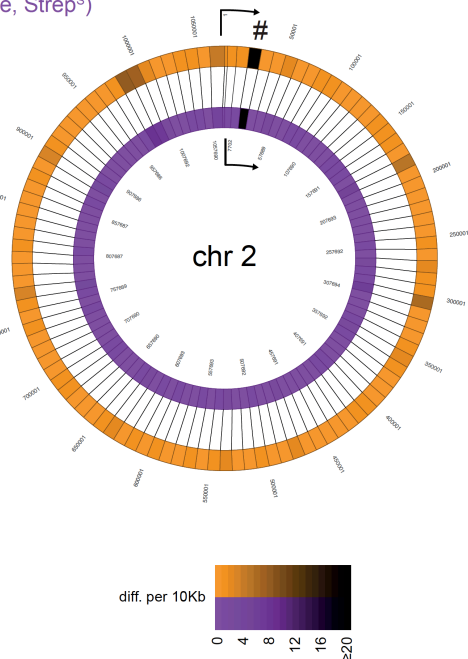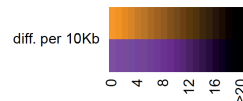

Supplement: supp [file elife-48212-supp-v1.zip]

**A**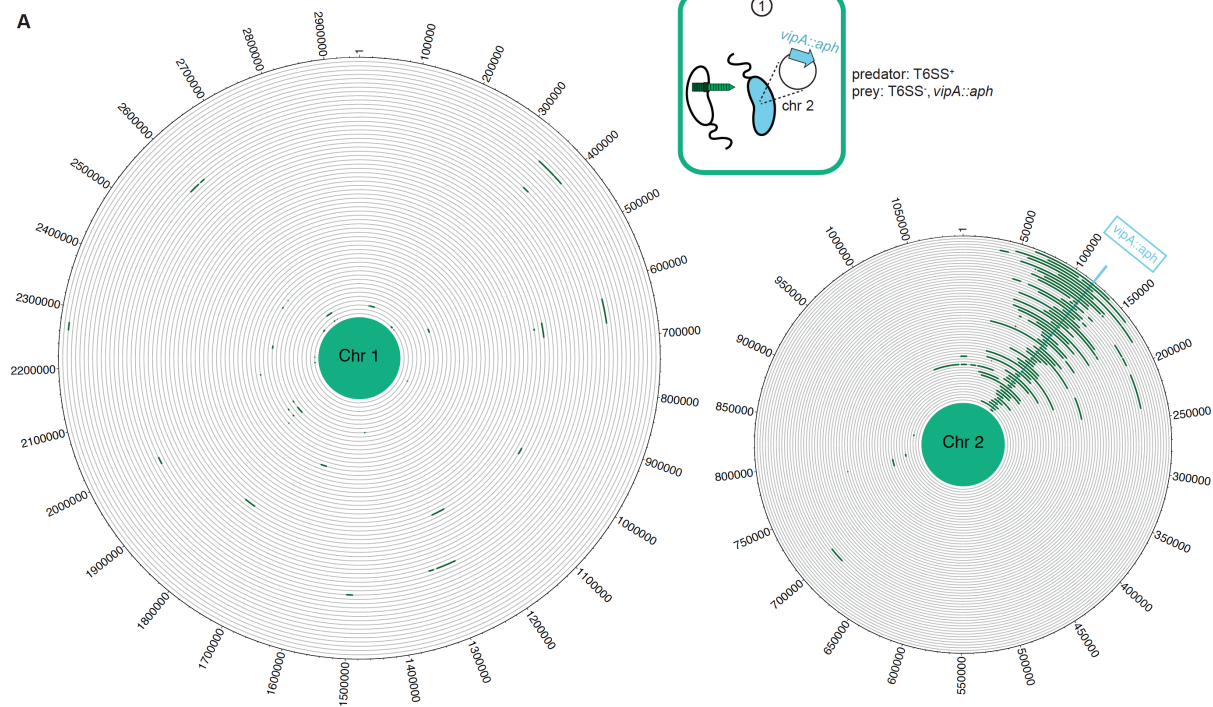**B**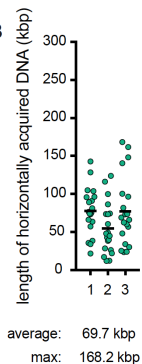**C**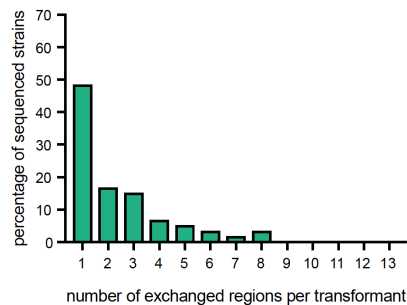**D**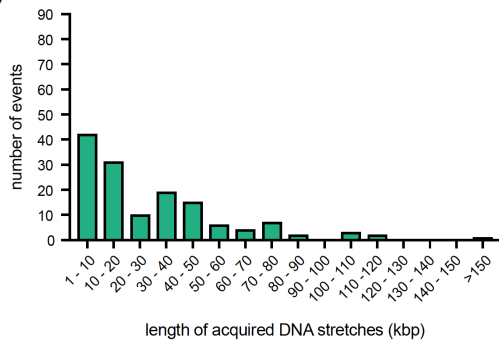

Supplement: supp [file elife-48212-supp-v1.zip]

**A**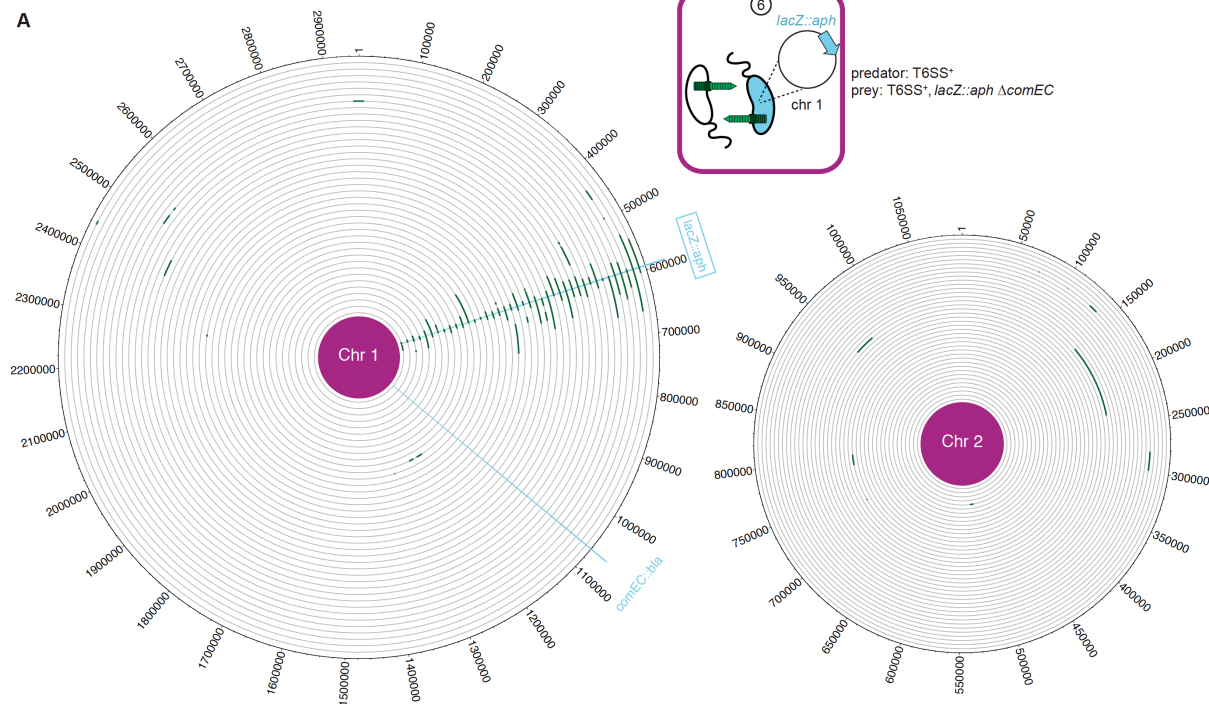**B**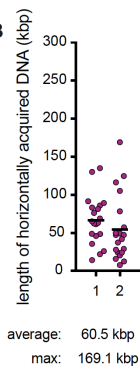**C**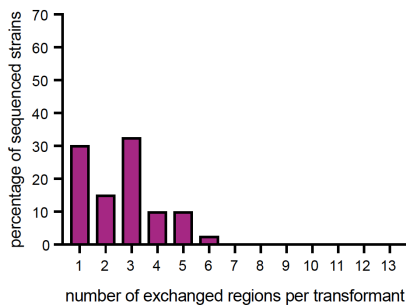**D**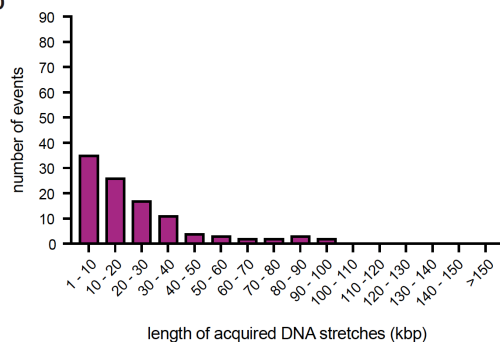

Supplement: supp [file elife-48212-supp-v1.zip]

**A**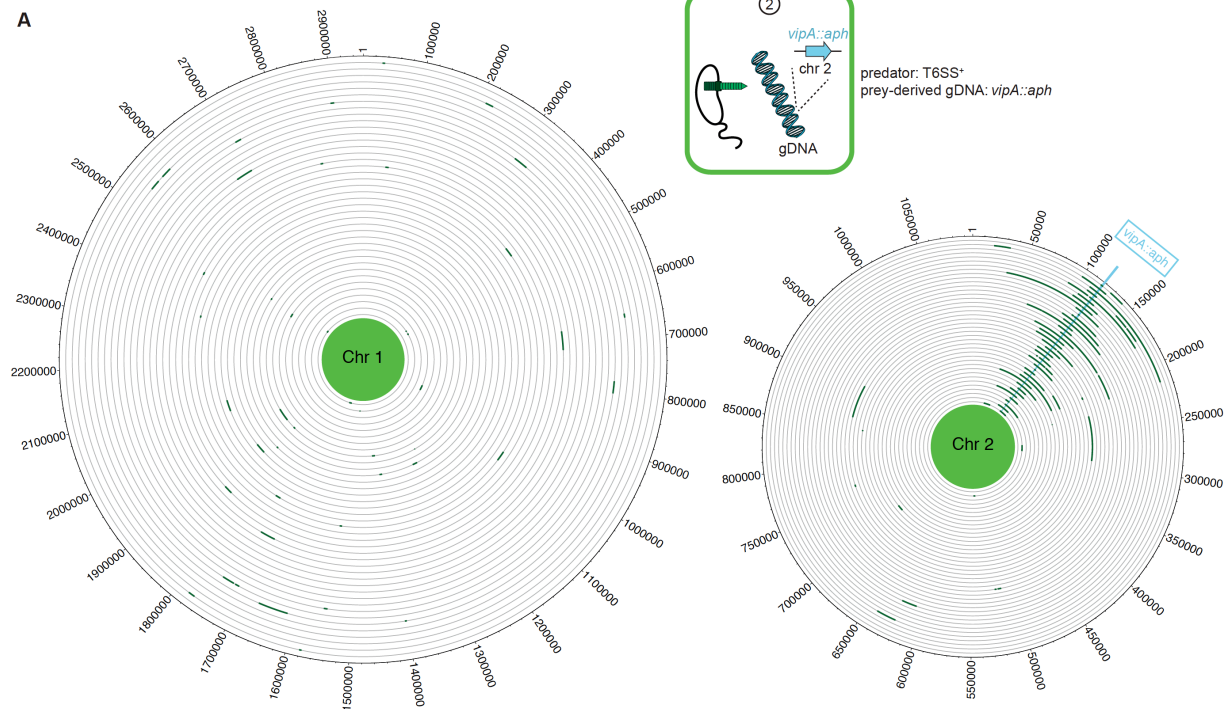**B**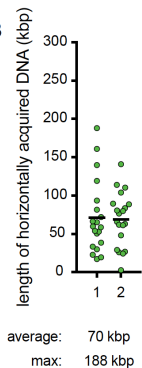**C**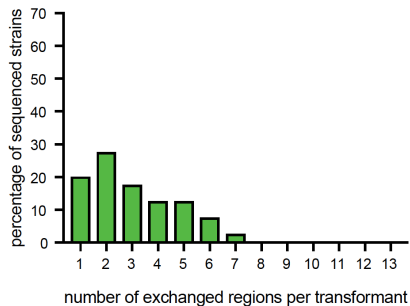**D**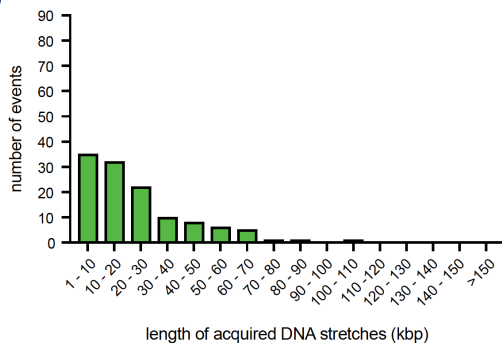

Supplement: supp [file elife-48212-supp-v1.zip]

A

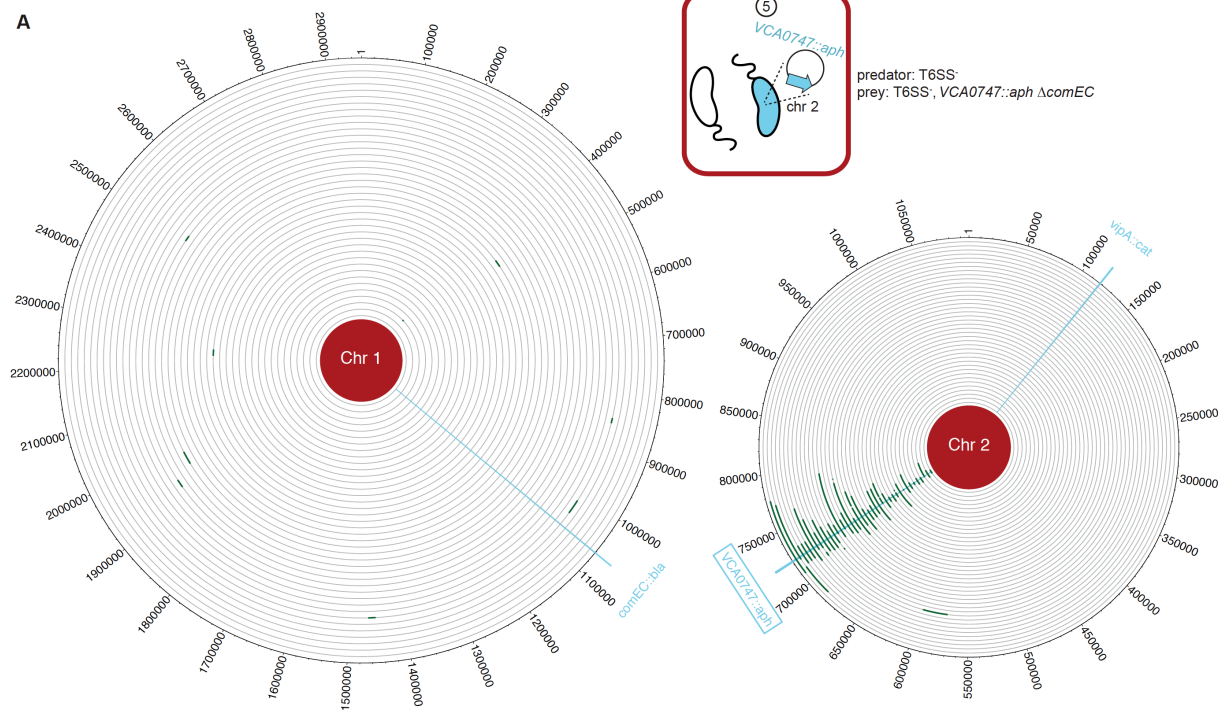

B

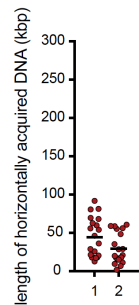

C

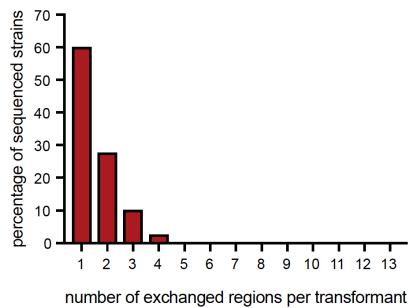

D

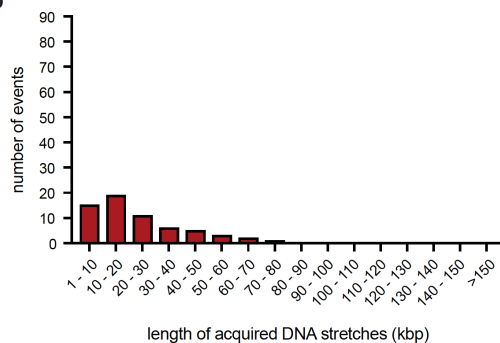

Supplement: supp [file elife-48212-supp-v1.zip]

**A**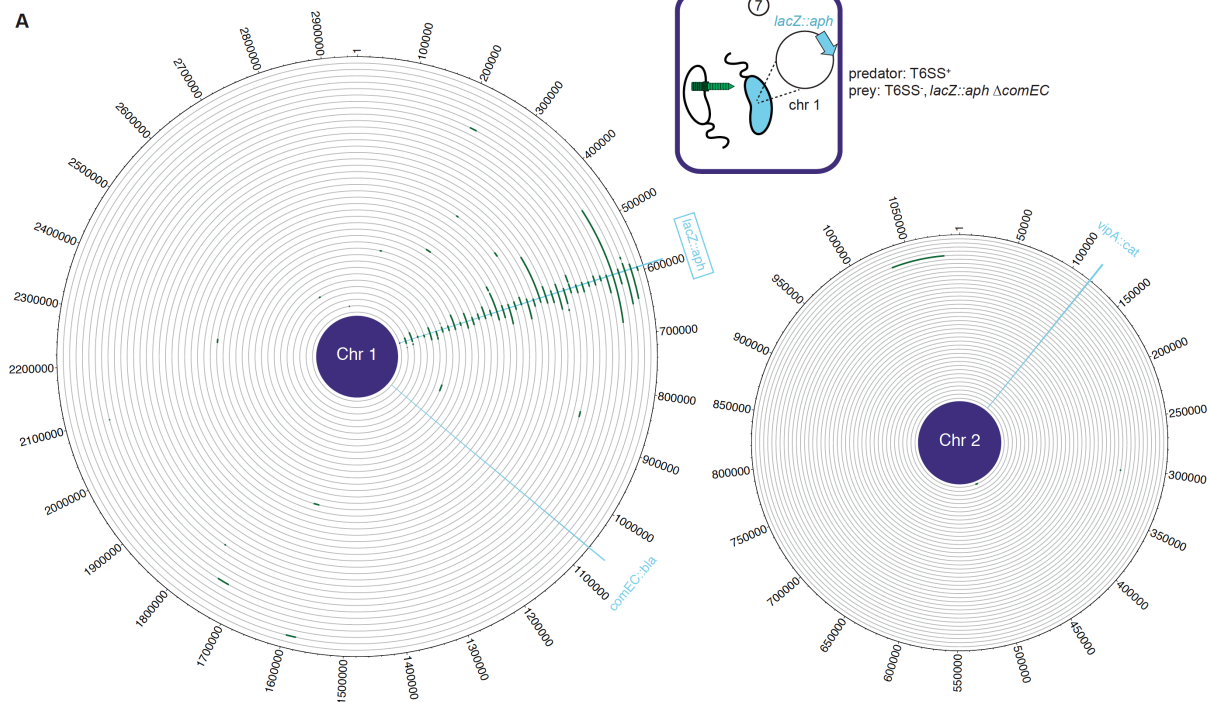**B**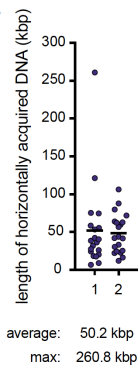**C**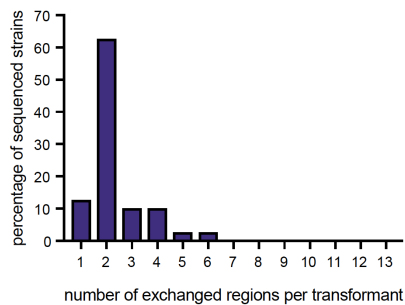**D**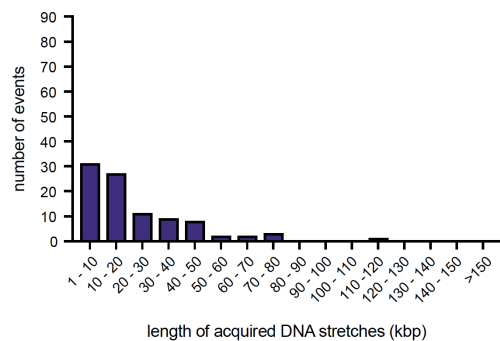

Supplement: supp [file elife-48212-supp-v1.zip]

**A**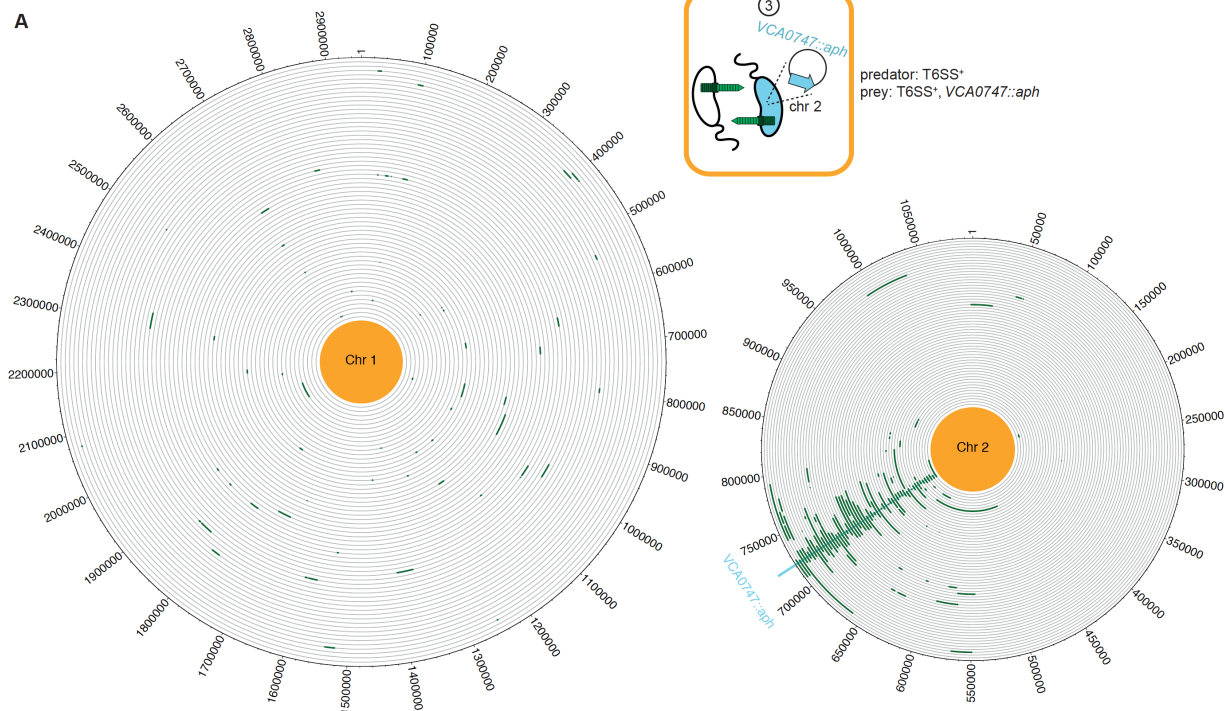**B**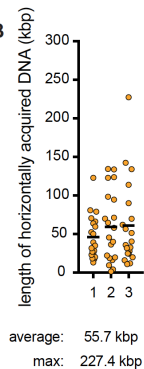**C**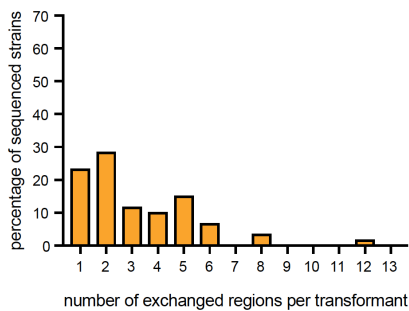**D**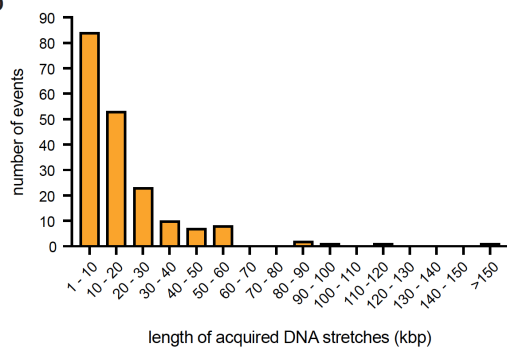

Supplement: supp [file elife-48212-supp-v1.zip › elife_poa_e48212_Figure_4_figure_supplement_4.pdf]

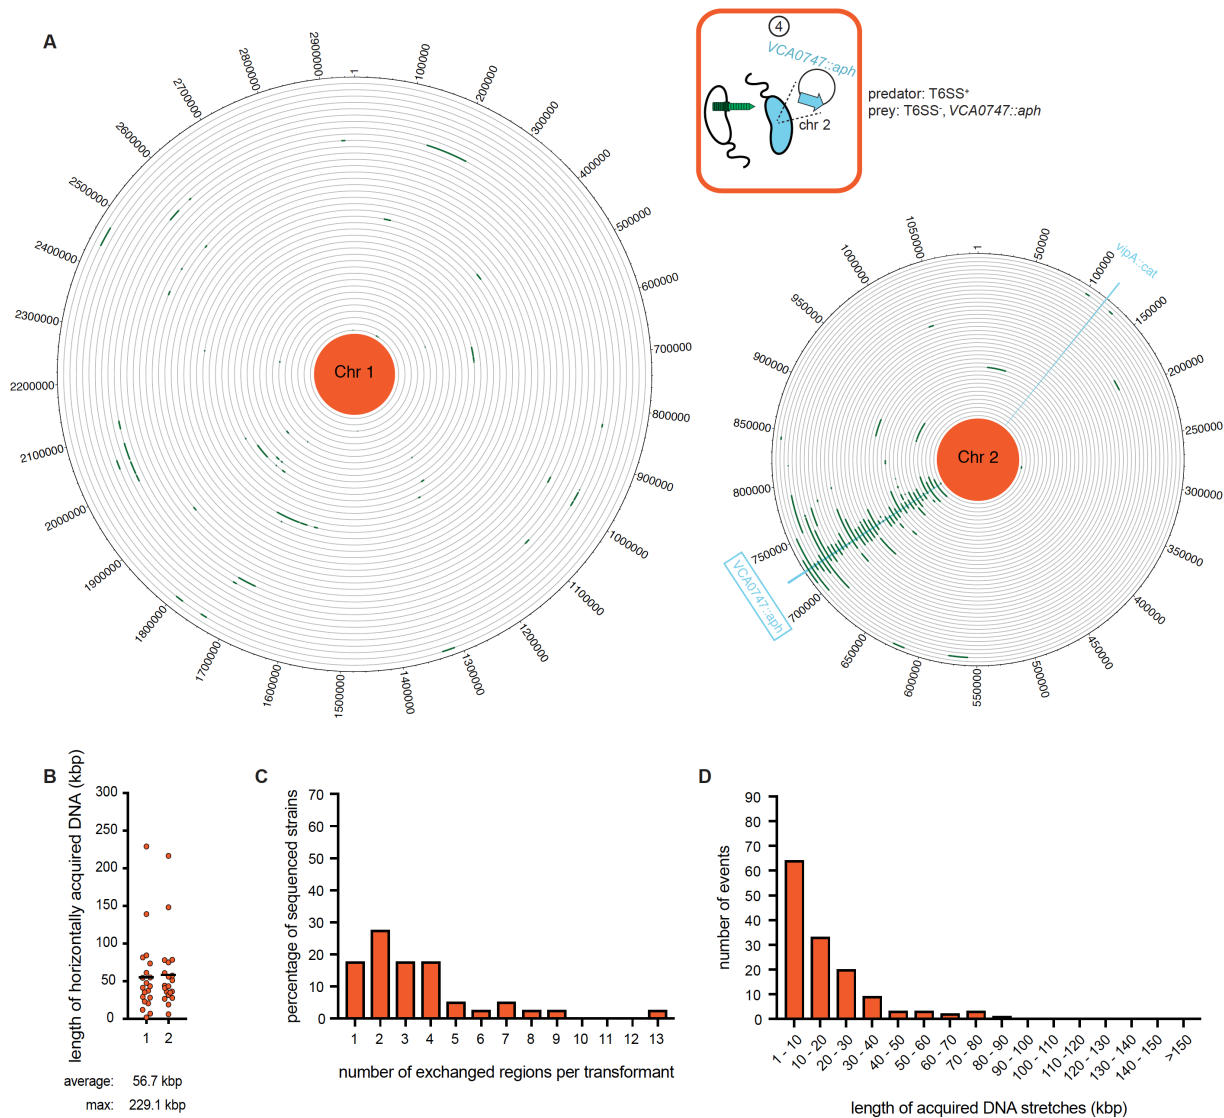

Supplement: supp [file elife-48212-supp-v1.zip › elife_poa_e48212_Figure_4_figure_supplement_5.pdf]
